# Supplementary material for: Assessment of Bioactive Phenolic Compounds in Musts and the Corresponding Wines of White and Red Grape Varieties
Source: MDPI journal article supplement (doi:10.3390/app13095722), 2023-05-05
Supplement: s1 [file s1]

# Assessment of Bioactive Phenolic Compounds in Musts and the Corresponding Wines of White and Red Grape Varieties

Petronela Anca Onache <sup>1,2</sup>, Alina Florea <sup>1</sup>, Elisabeta-Irina Geana <sup>3,\*</sup>, Corina Teodora Ciucure <sup>2,3</sup>, Roxana Elena Ionete <sup>3</sup>, Dorin Ioan Sumedrea <sup>1</sup> and Ovidiu Tița <sup>2</sup>

- <sup>1</sup> National Research & Development Institute for Biotechnology in Horticulture Stefanesti—Arges, 117715 Stefanesti, Romania; anca27il@yahoo.com (P.A.O.); alinaflorea964@gmail.com (A.F.); dsumedrea@yahoo.com (D.I.S.)
  - <sup>2</sup> Faculty of Agricultural Sciences, Food Industry and Enviromental Protection, “Lucian Blaga” University of Sibiu, 550169 Sibiu, Romania; corina.ciucure@icsi.ro (C.T.C.); ovidiu.tita@ulbsibiu.ro (O.T.)
  - <sup>3</sup> National Research & Development Institute for Cryogenic and Isotopic Technologies—ICSI Ramnicu Vâlcea, 240050 Ramnicu Valcea, Romania; roxana.ionete@icsi.ro
- \* Correspondence: irina.geana@icsi.ro; Tel.: +40-745752559

## Supplementary figures

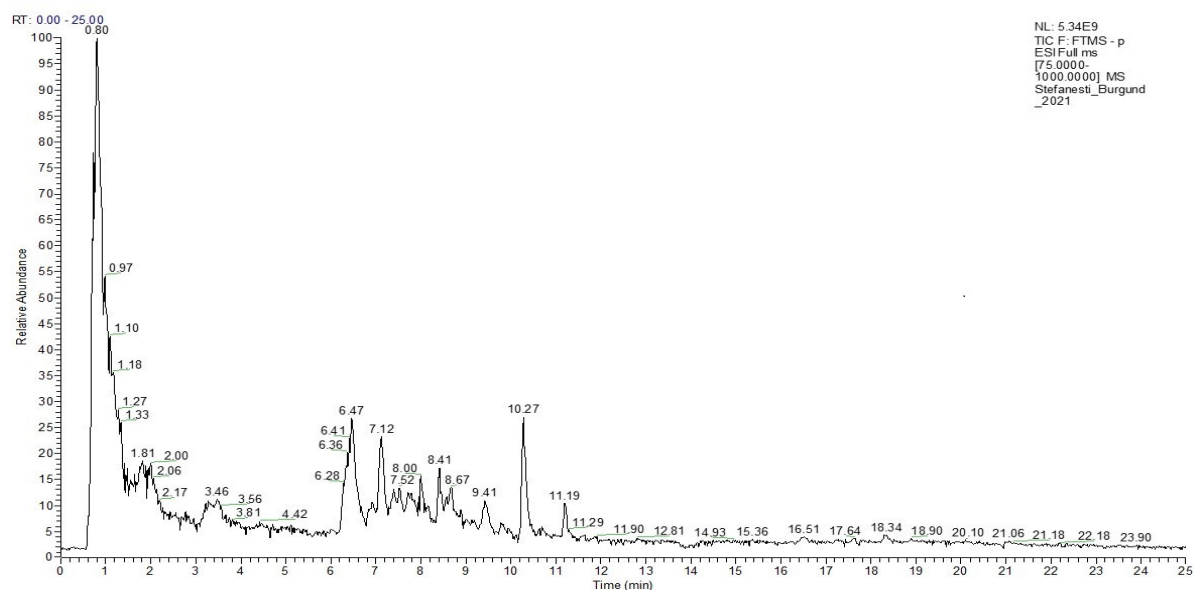

**Figure S1.** The obtained total ion current (TIC) chromatogram for the separation of polyphenolic compounds in Burgund Mare grape must by UHPLC–ESI/HRMS.

## Supplementary tables

**Table S1.** The viticultural climate of the vegetation and maturation period corresponding to Stefanesti vineyard during the 2021 harvest year.

| Period    | Temperature (°C) |         |         | Precipitations<br>(mm) | Days with<br>rainfall<br>> 10 mm | Sunshine (h) |
|-----------|------------------|---------|---------|------------------------|----------------------------------|--------------|
|           | Average          | Minimum | Maximum |                        |                                  |              |
| March     | 4.8              | -1.1    | 12.3    | 73.8                   | 10                               |              |
| April     | 8.9              | 2.5     | 16.7    | 56.2                   | 12                               | -            |
| May       | 16.4             | 9.5     | 25.0    | 108.4                  | 16                               | -            |
| June      | 20.4             | 13.9    | 29.9    | 90.6                   | 16                               | -            |
| July      | 24.3             | 17.0    | 33.7    | 23.0                   | 5                                | 256.3        |
| August    | 23.8             | 15.5    | 34.4    | 65.4                   | 7                                | 228.2        |
| September | 17.1             | 9.4     | 27.5    | 13.2                   | 5                                | 172.4        |

**Table S2.** Content of total phenolic compounds (TPC, expressed as mg GAE/l), total anthocyanins (TA, expressed in mg/l), TC – total catechins – catechine/ flavonoid content mg/l, TT- tannins (expressed in mg/l), AA-antioxidant activity (expressed in mMol Trolox/l) in wine and grape must.

| Wine/Musts         | TPC (mg GAE/L) | AA (mMol Trolox/L) | TA (mg/L)   | TC (mg/L)    | Tannins (mg/L) | references |
|--------------------|----------------|--------------------|-------------|--------------|----------------|------------|
| Shiraz             | 2064           | 13.01              | 198         | 17.8         | 1293           | [1]        |
| Cabernet Sauvignon | 2382           | 15.9               | 190         | 10.8         | 1476           |            |
| Merlot wine        | 2518           | 15.21              | 134         | 7.98         | 1312           |            |
| Chardonnay         | 445            | 1.54               | --          | -            | -              |            |
| Cabernet Sauvignon | 2081-24861     | 19.2               | -           | -            | -              | [2]        |
| Syrah              | 2293-2338      | 20.2               | -           | -            | -              |            |
| Merlot             | 2200-2239      | 19.9               | -           | -            | -              |            |
| Pinot Noir         | 2329           | 21.2               | -           | -            | -              |            |
| Merlot             |                | 21.7               | -           | -            | -              |            |
| Cabernet Sauvignon |                | 17.5               | -           | -            | -              |            |
| Syrah              |                | 19.7               | -           | -            | -              |            |
| Sauvignon          | 262            | 1.69               | -           | -            | -              |            |
| Chardonnay         | 379            | 2.31               | -           | -            | -              |            |
| Terret Sauvignon   | 289            |                    | -           | -            | -              |            |
| Cabernet Sauvignon | 1750.9-2424.1  | 7.49-11.36         | 358.4-887.6 | 131.7-166.1  | -              | [3]        |
| Muscat Ottonel     | 2365.9         | 3.19               | -           | 2170.6       | -              | [4]        |
| Shiraz             | 2938.2         | 4.19               | -           | 2647.1       | -              |            |
|                    | 1687.5         | 4.6 9              | -           | 1253.3       | -              |            |
| Barbera            | 2479.7         | 4.89               | -           | 2117.4       | -              |            |
| Blended -          | 1498.1         | 6.79               | -           | 1184.0       | -              |            |
| Chasselar Dore     | 306.0          | 13.89              | -           | 89.8         | -              |            |
| Merlot             | 1977 - 2246    | 10.8-11.4          | 71.4<br>154 | 1086<br>1110 | -              | [5]        |
| Cabernet Sauvignon | 1646-2360      | 9.0-12.4           | 70.1-107.0  | 510-1028     | -              |            |
| Risling Italian    | 303            | 0.25               | nd          | 42.5         | -              |            |

|                                          |             |                                       |         |           |      |      |
|------------------------------------------|-------------|---------------------------------------|---------|-----------|------|------|
| Cabernet Sauvignon                       | 1469        | -                                     | 371     | 1976      | 1724 | [6]  |
| Merlot                                   | 1714        | -                                     | 387     | 2170      | 2721 |      |
| Cabernet Sauvignon<br>Grape juice / wine | 416 / 1329  | 0.35 / 0.07<br>DPPH - IC50<br>(mg/mL) | -       | -         | -    | [7]  |
| Riesling Italian<br>Grape juice / wine   | 2036 / 2162 | 8.40 / 0.09<br>DPPH - IC50<br>(mg/mL) | -       | -         | -    |      |
| Feteasca Regala                          | 230         | 0.93                                  | -       | -         | -    | [8]  |
| Feteasca Neaga                           | 1877 / 2359 | 9.84                                  | -       | -         | -    |      |
| Busuioaca de Bohotin                     | 243         | 8.95                                  | -       | -         | -    |      |
| Malbec                                   | 1932-3506   | -                                     | 261-802 | 1932-4943 | -    | [9]  |
| Merlot                                   | 1720        | 17.6                                  | -       | -         | -    | [10] |
| Cabernet Sauvignon                       | 2320        | 18.1                                  | -       | -         | -    |      |

**Table S3.** Phenolic compounds in white grape musts (m) and wines (w) (mg/l).

|                 | <b>Riesling Italian</b> | <b>Feteasca Regala</b>               | <b>Chardonnay</b>                        | <b>Muscat Ottonel</b>        | <b>Sauvignon Blanc</b> |
|-----------------|-------------------------|--------------------------------------|------------------------------------------|------------------------------|------------------------|
| gallic acid     | n.d. (m)/0.07 (w) [7]   | n.d. (w) [11]                        | n.d. (w) [7]; n.d. (w) [11]              | 7.21 (w) [12]                | 1.72-1.85 (w) [11]     |
| syringic acid   | n.d. (m)/0.10 (w) [7]   | 2.05 (w) [8]                         | 0.17 (w) [7]                             | -                            | -                      |
| Ferrulic acid   |                         | 0.16-0.84 (w) [11]                   | 0.26 (w) [7]; 0.68 (w) [11]              | 0.97 (w) [12]; 0.84 (w) [11] | 0.19-0.24 (w) [11]     |
| t-cinnamic acid | -                       | n.d. (w) [11]                        | n.d. (w) [11]                            | n.d. (w) [11]                | n.d. (w) [11]          |
| Caffeic acid    | n.d. (m)/3.26 (w) [7]   |                                      | 4.19 (w) [12]                            | 15.1 (w) [11]                | -                      |
| p-coumaric acid | 0.19 (m)/0.21 (w) [7]   | 2.19-2.48 (w) [11]                   | 0.15 (m)/1.16 (w) [11];<br>2.12 (w) [11] | 9.85 (w) [12]; 1.86 (w) [11] | 1.92-2.02 (w) [11]     |
| Ellagic acid    | -                       | -                                    | 0.64 (w) [12]                            | -                            | -                      |
| catechin        | n.d. (m)/2.00 (w) [7]   | 35.64 (w) [8];<br>5.32-5.42 (w) [11] | n.d. (m)/1.34 (w) [7]                    | -                            | 9.38-9.72 (w) [11]     |
| epicatechin     | n.d. (m)/1.43 (w) [7]   | 35.11 (w) [8];<br>4.50-6.05 (w) [11] | n.d. (m)/1.16 (w) [7];<br>2.66 (w) [11]  | 23.0 (w) [12]; 4.61 (w) [11] | 2.53-10.99 (w) [11]    |
| quercetin       | 0.18 (m)/0.19 (w) [7]   | -                                    | 0.19 (m)/n.d. (w) [7]                    | 8.40 (w) [12]                | -                      |
| rutin           | n.d.                    | -                                    |                                          | 3.2 (w) [12]                 | -                      |
| kaempferol      | n.d.                    | 8.44 (w) [8]                         | n.d. [7]                                 | 0.9 (w) [12]                 | -                      |
| t-resveratrol   | n.d. (m)/0.71 (w) [7]   | 1.4 (w) [8]                          | n.d. (m)/1.13 (w) [7]                    | 0.5 (w) [12]                 | 0.31-0.62 (w) [13]     |

|  |                   |                                           |               |                                      |                    |
|--|-------------------|-------------------------------------------|---------------|--------------------------------------|--------------------|
|  | 0.21-2.4 (w) [13] | 0.11-.037 (w) [13];<br>0.43-2.84 (w) [11] | 0.67 (w) [11] | 0.34-0.92 (w) [13];<br>0.77 (w) [11] | n.d.-2.04 (w) [11] |
|--|-------------------|-------------------------------------------|---------------|--------------------------------------|--------------------|

**Table S4.** Phenolic compounds in red grape musts (m) and wines (w) (mg/l).

|                 | <b>Cabernet Sauvignon</b>                                                               | <b>Merlot</b>                                                             | <b>Pinot Noire</b> | <b>Feteasca Neagra</b> | <b>Shiraz</b> | <b>Tempranillo</b>    |
|-----------------|-----------------------------------------------------------------------------------------|---------------------------------------------------------------------------|--------------------|------------------------|---------------|-----------------------|
| gallic acid     | 11.66 (w) [6]<br>0.31 (m)/0.81 (w) [7]<br>61.22 (w) [12]<br>47.0 (w) [12]               | 17.01 (w) [6]<br>0.43 (m)/1.53 (w) [7]<br>52.11 (w) [12]<br>47.0 (w) [12] | 1.74 (w) [11]      | -                      | 15.38 (w) [4] | 4.25 (w) [14]         |
| syringic acid   | 3.63 (w) [6]<br>1.01 (m)/0.81 (w) [7]<br>5.12 (w) [12]                                  | 1.84 (w) [6]<br>1.48 (m)/1.19 (w) [7]<br>5.09 (w) [10]                    | -                  | 41.83-43.57 (w) [8]    | 7.32 (w) [4]  | -                     |
| Ferrulic acid   | 1.21 (w) [12]<br>0.1 (w) [11]                                                           | 0.06 (m)/0.1 (w) [10]<br>1.01 (w) [12]<br>0.79 (w) [11]                   | 0.65 (w) [11]      | -                      | -             | -                     |
| t-cinnamic acid | 0.73 (w) [11]                                                                           | 1.13 (w) [11]                                                             | 0.56 (w) [11]      | -                      | 3.71 (w) [4]  | 1.69 (w) [14]         |
| Caffeic acid    | n.d. (w) [6]<br>0.78 (m)/2.04 (w) [7]<br>10.4 (w) [12]                                  | 0.29 (w) [6]<br>0.54 (m)/0.82 (w) [7]<br>7.05 (w) [12]                    | -                  | -                      | 8.45 (w) [4]  | 2.45 (w) [14]         |
| p-coumaric acid | 1.07 (w) [6]<br>0.47 (m)/0.21 (w) [7]<br>7.87 (w) [12]<br>2.09 (w) [11]                 | n.d. (w) [6]<br>0.29 (m)/0.82 (w) [7]<br>7.05 (w) [12]<br>2.13 (w) [11]   | 1.82 (w) [11]      | -                      | 18.33 (w) [4] | --                    |
| ellagic acid    | -                                                                                       | 0.76 (m)/3.16 (w) [7]                                                     | -                  | -                      | -             | -                     |
| catechin        | 27.18 (w) [6]<br>3.62 (m)/4.78 (w) [7]<br>25.73(w) [12]<br>5.99 (w) [11]                | 46.97 (w) [6]<br>7.38 (m)/7.70 (w) [7]<br>20.29 (w) [10]<br>6.04 (w) [11] | 21.62 (w) [11]     | 241.16-331.59 (w) [8]  | 3.56(w) [4]   | 24.83 (w) [14]        |
| epicatechin     | 8.56 (w) [6]<br>6.45 (m)/15.5 (w) [7]<br>51.91 (w) [10]<br>25.7(w) [4]<br>1.43 (w) [11] | 19.10 (w) [6]<br>26.37 (w) [10]<br>33.1 (w) [12]<br>3.13 (w) [11]         | 2.34 (w) [11]      | 197.16-299.16 (w) [8]  | 2.32 (w) [4]  | 22.17 (w) [14]        |
| quercetin       | 4.57 (w) [6]                                                                            | 4.65 (w) [6]                                                              | -                  | -                      | -             | 0.04 (w) <sup>s</sup> |

|             |                                                                              |                                                                            |                                     |                                         |              |               |
|-------------|------------------------------------------------------------------------------|----------------------------------------------------------------------------|-------------------------------------|-----------------------------------------|--------------|---------------|
|             | 0.19 (m)/0.22 (w) [7]<br>5.46 (w) [12]                                       | 0.19 (m)/0.2 (w) [7]<br>5.78 (w) [12]                                      |                                     |                                         |              |               |
| rutin       | 0.02 (m)/0.17 (w) [7]<br>3.4 (w) [12]                                        | 2.52(w) [12]                                                               | -                                   | 25.64-71.34 (w) [8]                     | 5.33 (w) [4] | 0.74 (w) [14] |
| kaempferol  | n.d. (w) [6]<br>0.01 (m)/n.d. (w) [7]<br>0.67 (w) [12]                       | 0.54 (w) [6]<br>0.62 (w) [12]                                              | -                                   | -                                       | -            | -             |
| resveratrol | 0.31 (w) [6]<br>0.08 (m)/0.75 (w) [7]<br>0.69 (w) [12]<br>0.91-1.25 (w) [13] | 0.55 (w) [6]<br>0.8 (m)/2.42 (w) [7]<br>0.4 (w) [12]<br>1.31-3.72 (w) [13] | 1.67-5.19 (w) [13]<br>0.62 (w) [11] | 2.63-3.52 (w) [8]<br>1.61-4.54 (w) [13] | 2.76 (w) [4] | n.d. [14]     |

**Table S5.** Correlation matrix and Pearson coefficients of determination for individual phenolic compounds in must and wine for white grape cultivars.

| Variables | GaA          | 3,4-DHBA     | 4-HBA        | Cat          | ChIA     | CafA         | ECat         | SyA          | p-CoumA      | FA           | Resv     | EIA          | AbsA          | CinA          | Qu           | Kae           | iRh           | Apig         | Pin           | Chry          | Ga           |
|-----------|--------------|--------------|--------------|--------------|----------|--------------|--------------|--------------|--------------|--------------|----------|--------------|---------------|---------------|--------------|---------------|---------------|--------------|---------------|---------------|--------------|
| GaA       | <b>1</b>     | 0.681        | <b>0.766</b> | 0.106        | -0.290   | -0.225       | 0.085        | <b>0.980</b> | 0.314        | 0.215        | -0.170   | 0.594        | -0.324        | -0.630        | -0.304       | 0.353         | 0.558         | -0.239       | <b>0.926</b>  | 0.014         | -0.313       |
| 3,4-DHBA  | 0.681        | <b>1</b>     | 0.528        | -0.432       | -0.548   | -0.072       | -0.395       | 0.546        | 0.326        | 0.454        | -0.195   | <b>0.851</b> | 0.052         | -0.433        | -0.153       | 0.042         | 0.169         | -0.323       | 0.606         | -0.127        | -0.402       |
| 4-HBA     | <b>0.766</b> | 0.528        | <b>1</b>     | -0.039       | -0.479   | 0.328        | 0.298        | 0.704        | 0.247        | 0.146        | -0.122   | 0.207        | 0.105         | -0.265        | 0.215        | -0.086        | 0.163         | -0.601       | 0.668         | -0.375        | -0.627       |
| Cat       | 0.106        | -0.432       | -0.039       | <b>1</b>     | 0.700    | 0.104        | <b>0.731</b> | 0.178        | -0.112       | -0.330       | 0.561    | -0.147       | -0.365        | -0.377        | 0.110        | 0.563         | 0.493         | 0.563        | 0.045         | 0.438         | 0.547        |
| ChIA      | -0.290       | -0.548       | -0.479       | 0.700        | <b>1</b> | -0.121       | 0.582        | -0.206       | 0.190        | -0.033       | 0.381    | -0.301       | -0.006        | -0.140        | -0.140       | 0.094         | -0.077        | 0.465        | -0.198        | 0.105         | 0.468        |
| CafA      | -0.225       | -0.072       | 0.328        | 0.104        | -0.121   | <b>1</b>     | 0.429        | -0.336       | -0.238       | -0.308       | 0.506    | -0.190       | 0.404         | 0.361         | <b>0.978</b> | -0.241        | -0.236        | -0.107       | -0.421        | -0.177        | -0.225       |
| ECat      | 0.085        | -0.395       | 0.298        | <b>0.731</b> | 0.582    | 0.429        | <b>1</b>     | 0.116        | 0.284        | -0.065       | 0.284    | -0.418       | 0.212         | -0.187        | 0.358        | -0.053        | -0.029        | 0.050        | 0.085         | -0.164        | 0.089        |
| SyA       | <b>0.980</b> | 0.546        | 0.704        | 0.178        | -0.206   | -0.336       | 0.116        | <b>1</b>     | 0.281        | 0.154        | -0.192   | 0.488        | -0.418        | -0.606        | -0.404       | 0.394         | 0.595         | -0.206       | <b>0.929</b>  | 0.046         | -0.272       |
| p-CoumA   | 0.314        | 0.326        | 0.247        | -0.112       | 0.190    | -0.238       | 0.284        | 0.281        | <b>1</b>     | <b>0.871</b> | -0.590   | 0.083        | 0.584         | -0.536        | -0.376       | -0.468        | -0.383        | -0.383       | 0.555         | -0.559        | -0.133       |
| FA        | 0.215        | 0.454        | 0.146        | -0.330       | -0.033   | -0.308       | -0.065       | 0.154        | <b>0.871</b> | <b>1</b>     | -0.640   | 0.157        | 0.630         | -0.562        | -0.451       | -0.495        | -0.432        | -0.475       | 0.501         | -0.571        | -0.094       |
| Resv      | -0.170       | -0.195       | -0.122       | 0.561        | 0.381    | 0.506        | 0.284        | -0.192       | -0.590       | -0.640       | <b>1</b> | 0.077        | -0.304        | 0.209         | 0.533        | 0.406         | 0.267         | 0.463        | -0.429        | 0.380         | 0.149        |
| EIA       | 0.594        | <b>0.851</b> | 0.207        | -0.147       | -0.301   | -0.190       | -0.418       | 0.488        | 0.083        | 0.157        | 0.077    | <b>1</b>     | -0.328        | -0.469        | -0.191       | 0.471         | 0.502         | 0.205        | 0.437         | 0.367         | -0.012       |
| AbsA      | -0.324       | 0.052        | 0.105        | -0.365       | -0.006   | 0.404        | 0.212        | -0.418       | 0.584        | 0.630        | -0.304   | -0.328       | <b>1</b>      | 0.089         | 0.281        | <b>-0.887</b> | <b>-0.874</b> | -0.560       | -0.139        | <b>-0.794</b> | -0.287       |
| CinA      | -0.630       | -0.433       | -0.265       | -0.377       | -0.140   | 0.361        | -0.187       | -0.606       | -0.536       | -0.562       | 0.209    | -0.469       | 0.089         | <b>1</b>      | 0.440        | -0.381        | -0.444        | -0.123       | <b>-0.742</b> | -0.161        | -0.374       |
| Qu        | -0.304       | -0.153       | 0.215        | 0.110        | -0.140   | <b>0.978</b> | 0.358        | -0.404       | -0.376       | -0.451       | 0.533    | -0.191       | 0.281         | 0.440         | <b>1</b>     | -0.131        | -0.148        | 0.041        | -0.532        | -0.012        | -0.120       |
| Kae       | 0.353        | 0.042        | -0.086       | 0.563        | 0.094    | -0.241       | -0.053       | 0.394        | -0.468       | -0.495       | 0.406    | 0.471        | <b>-0.887</b> | -0.381        | -0.131       | <b>1</b>      | <b>0.961</b>  | <b>0.739</b> | 0.162         | <b>0.915</b>  | 0.552        |
| iRh       | 0.558        | 0.169        | 0.163        | 0.493        | -0.077   | -0.236       | -0.029       | 0.595        | -0.383       | -0.432       | 0.267    | 0.502        | <b>-0.874</b> | -0.444        | -0.148       | <b>0.961</b>  | <b>1</b>      | 0.554        | 0.366         | <b>0.809</b>  | 0.383        |
| Apig      | -0.239       | -0.323       | -0.601       | 0.563        | 0.465    | -0.107       | 0.050        | -0.206       | -0.383       | -0.475       | 0.463    | 0.205        | -0.560        | -0.123        | 0.041        | <b>0.739</b>  | 0.554         | <b>1</b>     | -0.365        | <b>0.897</b>  | <b>0.832</b> |
| Pin       | <b>0.926</b> | 0.606        | 0.668        | 0.045        | -0.198   | -0.421       | 0.085        | <b>0.929</b> | 0.555        | 0.501        | -0.429   | 0.437        | -0.139        | <b>-0.742</b> | -0.532       | 0.162         | 0.366         | -0.365       | <b>1</b>      | -0.171        | -0.253       |
| Chry      | 0.014        | -0.127       | -0.375       | 0.438        | 0.105    | -0.177       | -0.164       | 0.046        | -0.559       | -0.571       | 0.380    | 0.367        | <b>-0.794</b> | -0.161        | -0.012       | <b>0.915</b>  | <b>0.809</b>  | <b>0.897</b> | -0.171        | <b>1</b>      | 0.704        |
| Ga        | -0.313       | -0.402       | -0.627       | 0.547        | 0.468    | -0.225       | 0.089        | -0.272       | -0.133       | -0.094       | 0.149    | -0.012       | -0.287        | -0.374        | -0.120       | 0.552         | 0.383         | <b>0.832</b> | -0.253        | 0.704         | <b>1</b>     |

Values in bold are different from 0 with a significance level  $\alpha=0.05$ .

**Table S6.** Correlation matrix and Pearson coefficients of determination for individual phenolic compounds in must and wine for red grape cultivars.

| Variables | GaA          | 3,4-DHBA | 4-HBA        | Cat          | ChIA         | CafA         | ECAt         | SyA          | p-CoumA      | FA           | Resv         | EIA          | AbsA     | CinA         | Qu           | Kae          | iRh          | Apig         | Pin      | Chry         | Ga           |
|-----------|--------------|----------|--------------|--------------|--------------|--------------|--------------|--------------|--------------|--------------|--------------|--------------|----------|--------------|--------------|--------------|--------------|--------------|----------|--------------|--------------|
| GaA       | <b>1</b>     | 0.553    | 0.092        | 0.146        | -0.048       | -0.285       | -0.117       | <b>0.897</b> | 0.639        | <b>0.812</b> | 0.323        | 0.344        | 0.636    | 0.318        | 0.227        | -0.071       | -0.050       | -0.486       | -0.405   | -0.461       | -0.555       |
| 3,4-DHBA  | 0.553        | <b>1</b> | 0.088        | -0.455       | 0.151        | -0.605       | -0.518       | 0.804        | 0.252        | 0.266        | 0.061        | 0.169        | -0.066   | 0.477        | -0.406       | -0.487       | -0.372       | -0.734       | 0.119    | -0.656       | -0.717       |
| 4-HBA     | 0.092        | 0.088    | <b>1</b>     | -0.510       | <b>0.934</b> | -0.485       | -0.438       | 0.174        | 0.765        | 0.532        | -0.502       | 0.683        | 0.515    | 0.510        | -0.491       | -0.407       | -0.256       | -0.618       | 0.561    | -0.572       | -0.643       |
| Cat       | 0.146        | -0.455   | -0.510       | <b>1</b>     | -0.738       | <b>0.894</b> | <b>0.934</b> | -0.034       | -0.328       | -0.124       | <b>0.832</b> | 0.116        | 0.359    | -0.056       | <b>0.986</b> | <b>0.894</b> | <b>0.821</b> | 0.766        | -0.312   | 0.690        | 0.650        |
| ChIA      | -0.048       | 0.151    | <b>0.934</b> | -0.738       | <b>1</b>     | -0.656       | -0.625       | 0.082        | 0.665        | 0.409        | -0.697       | 0.449        | 0.251    | 0.412        | -0.699       | -0.555       | -0.422       | -0.671       | 0.562    | -0.707       | -0.710       |
| CafA      | -0.285       | -0.605   | -0.485       | <b>0.894</b> | -0.656       | <b>1</b>     | <b>0.976</b> | -0.354       | -0.598       | -0.496       | 0.725        | 0.073        | 0.095    | -0.051       | <b>0.848</b> | <b>0.921</b> | <b>0.875</b> | <b>0.922</b> | 0.001    | <b>0.827</b> | <b>0.817</b> |
| ECAt      | -0.117       | -0.518   | -0.438       | <b>0.934</b> | -0.625       | <b>0.976</b> | <b>1</b>     | -0.179       | -0.482       | -0.359       | <b>0.812</b> | 0.191        | 0.247    | 0.090        | <b>0.918</b> | <b>0.977</b> | <b>0.946</b> | <b>0.861</b> | -0.002   | 0.699        | 0.686        |
| SyA       | <b>0.897</b> | 0.804    | 0.174        | -0.034       | 0.082        | -0.354       | -0.179       | <b>1</b>     | 0.529        | 0.627        | 0.360        | 0.489        | 0.495    | 0.625        | 0.052        | -0.119       | -0.015       | -0.597       | -0.038   | -0.614       | -0.710       |
| p-CoumA   | 0.639        | 0.252    | 0.765        | -0.328       | 0.665        | -0.598       | -0.482       | 0.529        | <b>1</b>     | <b>0.950</b> | -0.351       | 0.522        | 0.727    | 0.320        | -0.265       | -0.428       | -0.361       | -0.732       | -0.033   | -0.675       | -0.755       |
| FA        | <b>0.812</b> | 0.266    | 0.532        | -0.124       | 0.409        | -0.496       | -0.359       | 0.627        | <b>0.950</b> | <b>1</b>     | -0.162       | 0.413        | 0.763    | 0.216        | -0.050       | -0.303       | -0.282       | -0.631       | -0.294   | -0.587       | -0.665       |
| Resv      | 0.323        | 0.061    | -0.502       | <b>0.832</b> | -0.697       | 0.725        | <b>0.812</b> | 0.360        | -0.351       | -0.162       | <b>1</b>     | 0.286        | 0.279    | 0.336        | <b>0.844</b> | 0.795        | <b>0.812</b> | 0.504        | -0.066   | 0.406        | 0.341        |
| EIA       | 0.344        | 0.169    | 0.683        | 0.116        | 0.449        | 0.073        | 0.191        | 0.489        | 0.522        | 0.413        | 0.286        | <b>1</b>     | 0.771    | <b>0.863</b> | 0.141        | 0.206        | 0.396        | -0.264       | 0.604    | -0.284       | -0.420       |
| AbsA      | 0.636        | -0.066   | 0.515        | 0.359        | 0.251        | 0.095        | 0.247        | 0.495        | 0.727        | 0.763        | 0.279        | 0.771        | <b>1</b> | 0.486        | 0.415        | 0.285        | 0.352        | -0.166       | 0.008    | -0.220       | -0.328       |
| CinA      | 0.318        | 0.477    | 0.510        | -0.056       | 0.412        | -0.051       | 0.090        | 0.625        | 0.320        | 0.216        | 0.336        | <b>0.863</b> | 0.486    | <b>1</b>     | 0.011        | 0.164        | 0.376        | -0.332       | 0.711    | -0.495       | -0.572       |
| Qu        | 0.227        | -0.406   | -0.491       | <b>0.986</b> | -0.699       | <b>0.848</b> | <b>0.918</b> | 0.052        | -0.265       | -0.050       | <b>0.844</b> | 0.141        | 0.415    | 0.011        | <b>1</b>     | <b>0.913</b> | <b>0.843</b> | 0.726        | -0.323   | 0.573        | 0.551        |
| Kae       | -0.071       | -0.487   | -0.407       | <b>0.894</b> | -0.555       | <b>0.921</b> | <b>0.977</b> | -0.119       | -0.428       | -0.303       | 0.795        | 0.206        | 0.285    | 0.164        | <b>0.913</b> | <b>1</b>     | <b>0.973</b> | <b>0.829</b> | 0.013    | 0.558        | 0.576        |
| iRh       | -0.050       | -0.372   | -0.256       | <b>0.821</b> | -0.422       | <b>0.875</b> | <b>0.946</b> | -0.015       | -0.361       | -0.282       | <b>0.812</b> | 0.396        | 0.352    | 0.376        | <b>0.843</b> | <b>0.973</b> | <b>1</b>     | 0.721        | 0.215    | 0.452        | 0.447        |
| Apig      | -0.486       | -0.734   | -0.618       | 0.766        | -0.671       | <b>0.922</b> | <b>0.861</b> | -0.597       | -0.732       | -0.631       | 0.504        | -0.264       | -0.166   | -0.332       | 0.726        | <b>0.829</b> | 0.721        | <b>1</b>     | -0.133   | <b>0.841</b> | <b>0.907</b> |
| Pin       | -0.405       | 0.119    | 0.561        | -0.312       | 0.562        | 0.001        | -0.002       | -0.038       | -0.033       | -0.294       | -0.066       | 0.604        | 0.008    | 0.711        | -0.323       | 0.013        | 0.215        | -0.133       | <b>1</b> | -0.213       | -0.242       |
| Chry      | -0.461       | -0.656   | -0.572       | 0.690        | -0.707       | <b>0.827</b> | 0.699        | -0.614       | -0.675       | -0.587       | 0.406        | -0.284       | -0.220   | -0.495       | 0.573        | 0.558        | 0.452        | <b>0.841</b> | -0.213   | <b>1</b>     | <b>0.975</b> |
| Ga        | -0.555       | -0.717   | -0.643       | 0.650        | -0.710       | <b>0.817</b> | 0.686        | -0.710       | -0.755       | -0.665       | 0.341        | -0.420       | -0.328   | -0.572       | 0.551        | 0.576        | 0.447        | <b>0.907</b> | -0.242   | <b>0.975</b> | <b>1</b>     |

Values in bold are different from 0 with a significance level  $\alpha=0.05$



## References

1. Ginjom, I.R.; D'Arcy, B.R.; Caffin, N.A.; Gidley, M.J. Phenolic Contents and Antioxidant Activities of Major Australian Red Wines throughout the Winemaking Process. *J. Agric. Food Chem.* **2010**, *58*, 10133–10142, doi:10.1021/JF100822N.
2. Landrault, N.; Poucheret, P.; Ravel, P.; Gasc, F.; Cros, G.; Teissedre, P.L. Antioxidant Capacities and Phenolics Levels of French Wines from Different Varieties and Vintages. *J. Agric. Food Chem.* **2001**, *49*, 3341–3348, doi:10.1021/JF010128F.
3. Burin, V.M.; Falcão, L.D.; Chaves, E.S.; Gris, E.F.; Preti, L.F.; Bordignon-Luiz, M.T. Phenolic composition, colour, antioxidant activity and mineral profile of Cabernet Sauvignon wines. *Int. J. Food Sci. Technol.* **2010**, *45*, 1505–1512, doi:10.1111/J.1365-2621.2010.02296.X.
4. Woraratphoka, J.; Intarapichet, K.O.; Indrapichate, K. Phenolic compounds and antioxidative properties of selected wines from the northeast of Thailand. *Food Chem.* **2007**, *104*, 1485–1490, doi:10.1016/J.FOODCHEM.2007.02.020.
5. Li, H.; Wang, X.; Li, Y.; Li, P.; Wang, H. Polyphenolic compounds and antioxidant properties of selected China wines. *Food Chem.* **2009**, *112*, 454–460, doi:10.1016/J.FOODCHEM.2008.05.111.
6. Ortega, T.; De La Hera, E.; Carretero, M.E.; Gómez-Serranillos, P.; Naval, M.V.; Villar, A.M.; Prodanov, M.; Vacas, V.; Arroyo, T.; Hernández, T.; et al. Influence of grape variety and their phenolic composition on vasorelaxing activity of young red wines. *Eur. Food Res. Technol.* **2008**, *227*, 1641–1650, doi:10.1007/S00217-008-0888-9/TABLES/5.
7. Beara, I.N.; Torović, L.D.; Pintač, D.; Majkić, T.M.; Orčić, D.Z.; Mimica-Dukić, N.M.; Lesjak, M.M. Polyphenolic profile, antioxidant and neuroprotective potency of grape juices and wines from Fruška Gora region (Serbia). <https://doi.org/10.1080/10942912.2017.1375512> **2018**, *20*, S2552–S2568, doi:10.1080/10942912.2017.1375512.
8. Banc, R.; Loghin, F.; Miere, D.; Ranga, F.; Socaciu, C. Phenolic composition and antioxidant activity of red, rosé and white wines originating from Romanian grape cultivars. *Not. Bot. Horti Agrobot. Cluj-Napoca* **2020**, *48*, 716–734, doi:10.15835/NBHA48211848.
9. Fanzone, M.; Peña-Neira, A.; Jofré, V.; Assof, M.; Zamora, F. Phenolic characterization of malbec wines from mendoza province (Argentina). *J. Agric. Food Chem.* **2010**, *58*, 2388–97, doi:10.1021/jf903690v.
10. Anli, R.E.; Vural, N. Antioxidant phenolic substances of Turkish red wines from different wine regions. *Molecules* **2009**, *14*, 289–297, doi:10.3390/MOLECULES14010289.
11. Geana, E.I.; Marinescu, A.; Iordache, A.M.; Sandru, C.; Ionete, R.E.; Bala, C. Differentiation of Romanian Wines on Geographical Origin and Wine Variety by Elemental Composition and Phenolic Components. *Food Anal. Methods* **2014**, *7*, 2064–2074, doi:10.1007/S12161-014-9846-2.
12. Sen, I.; Tokatli, F. Authenticity of wines made with economically important grape varieties grown in Anatolia by their phenolic profiles. *Food Control* **2014**, *46*, 446–454, doi:10.1016/J.FOODCONT.2014.06.015.
13. Geana, E.I.; Costinel, D.; Marinescu, A.; Ionete, R.E.; Bala, C. Characterization of Wines by Trans - Resveratrol Concentration: A Case Study of Romanian Varieties. *Anal. Lett.* **2014**, *47*, 1737–1746, doi:10.1080/00032719.2014.883521.
14. Natividade, M.M.P.; Corrêa, L.C.; Souza, S.V.C. de; Pereira, G.E.; Lima, L.C. de O. Simultaneous analysis of 25 phenolic compounds in grape juice for HPLC: Method validation and characterization of São Francisco Valley samples. *Microchem. J.* **2013**, *110*, 665–674, doi:10.1016/J.MICROC.2013.08.010.
